# Supplementary material
Source: publisher figshare collection journal article supplement (https://sage.figshare.com/ndownloader/files/21142599)
Supplement: Supplementary file 1 [file 21142599]

## **Supplemental Materials for**

### **Clinicians' experiences with remote patient monitoring in peritoneal dialysis: a semi-structured interview study**

**Walker RC., Tong A., Howard, K., & Palmer SC.**

Supplemental File 1: Remote Patient Monitoring to Support Peritoneal Dialysis: Clinicians semi-structured interview questions

1. Can you tell me about your experience working with patients who are choosing or have commenced peritoneal dialysis?
2. Can you tell me about your knowledge or experience with remote patient monitoring?
3. How do you think your service can increase the uptake and maintenance of patients on peritoneal dialysis?
4. How do you think remote patient monitoring will help to better meet the needs of patients on peritoneal dialysis?
5. What are the advantages of remote patient monitoring to patients and families?
6. What do you think the advantages to you as a clinician are of having patients using remote patient monitoring?
7. What do you think the barriers to using remote patient monitoring are?
8. Have you had any experiences where remote monitoring has helped prevent a problem (delayed hospital admission, or any issue like low drain alarms/constipation etc has been picked up earlier)

Associate Professor Rachael C. Walker  
Eastern Institute of Technology,  
501 Gloucester Street, Taradale, Napier 4112, Hawke's Bay, New Zealand  
Tel: +64 6 272342905  
Email: [rwalker@eit.ac.nz](mailto:rwalker@eit.ac.nz)
